# Supplementary material
Source: Springer Nature journal article supplement (https://www.springermedizin.de/resource/supplementary/12906_2006_118_MOESM8_ESM.pdf/9524108)

● Testosterone alone ○ Testosterone+ethanolic EU extract (1 c.f.)

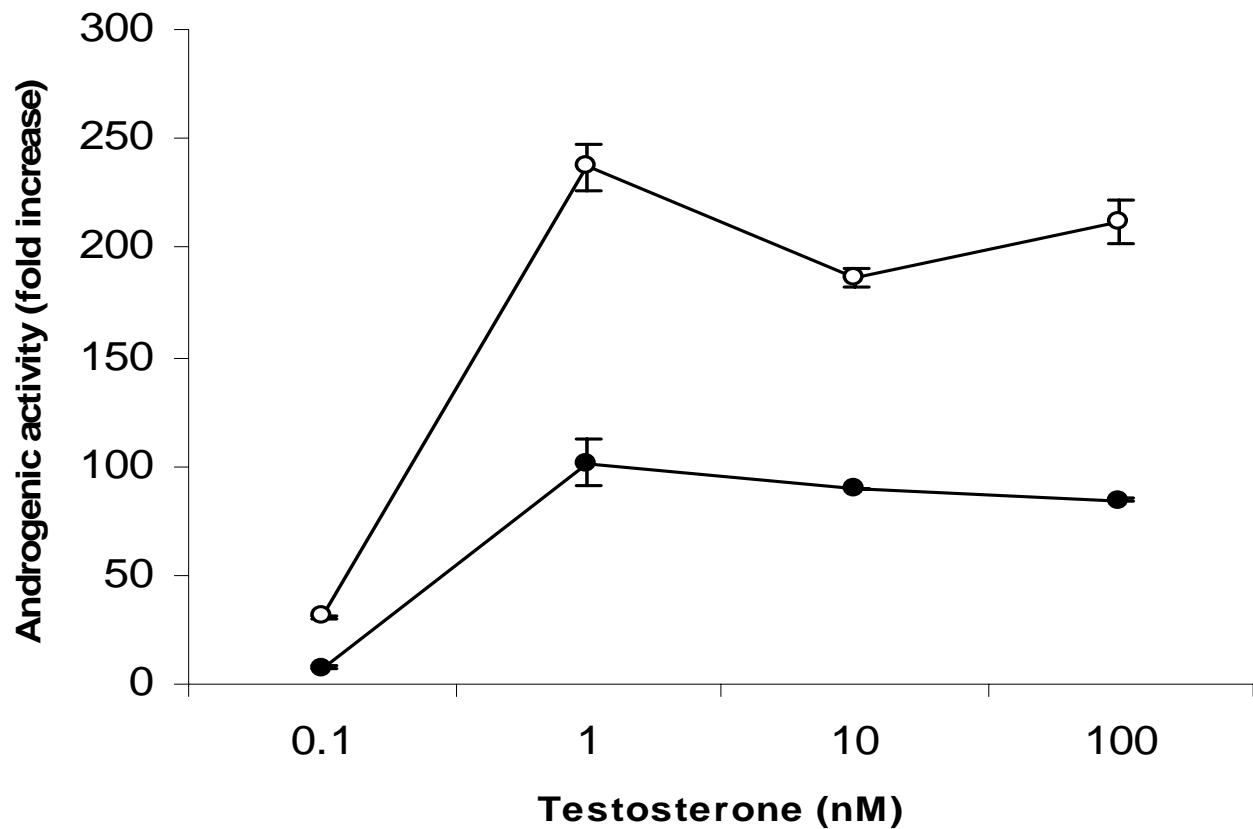

Supplement: MOESM8 [file 9524108]
